# Supplementary material
Source: publisher site journal article supplement (https://www.dovepress.com/get_supplementary_file.php?f=434840.docx)
Supplement: Supplementary file 1 [file get_supplementary_file.php]

**Table S1** Composition of vitamins in normal pellet diet [Data adapted from Harlan laboratories].

| **Vitamin** | **Concentration Unit** | |
| --- | --- | --- |
| Vitamin A | 15.8 | IU/g |
| Vitamin D3 | 3 | IU/g |
| Vitamin E | 135 | IU/Kg |
| Vitamin K3 | 50 | mg/Kg |
| Vitamin B1 | 28 | mg/Kg |
| Vitamin B2 | 8 | mg/Kg |
| Vitamin B3 | 61 | mg/Kg |
| Vitamin B5 | 21 | mg/Kg |
| Vitamin B6 | 12 | mg/Kg |
| Vitamin B12 | 0.05 | mg/Kg |
| Vitamin H2 | 0.38 | mg/Kg |
| Folate | 3 | mg/Kg |
| Choline | 2400 | mg/Kg |

**Table S2** Composition of minerals in normal pellet diet [Data adapted from Harlan laboratories].

| **Mineral** | **Concentration (mg/Kg)** |
| --- | --- |
| Potassium | 10 |
| Calcium | 20 |
| Magnesium | 3 |
| Phosphorus | 10 |
| Non- phytate phosphorus | 8 |
| Sodium | 4 |
| Chloride | 6 |
| Iron | 280 |
| Selenium | 0.1 |
| Manganese | 86 |
| Iodine | 3 |
| Copper | 24 |
| Zinc | 65 |
